# Supplementary material
Source: Springer Nature journal article supplement (https://www.springermedizin.de/resource/supplementary/12890_2011_340_MOESM1_ESM.pdf/9504970)
Supplement: MOESM1 [file 9504970]

**Clinical Suspicion of TB**  
Total = 275  
p = 27.0%

X-Ray:  
Normal or Sequelae

**n = 85**  
**p = 3.5%**

X-Ray:  
Typical, possible or atypical

**n = 190**  
**p = 37.0%**

Typical or possible X-Ray

**n = 76**  
**p = 71.0%**

Atypical X-Ray

**n = 114**  
**p = 14.0%**

No Weight Loss

**n = 30**  
**p = 60.0%**

Weight Loss

**n = 46**  
**p = 78.0%**

No Dyspnea

**n = 50**  
**p = 24.0%**

Dyspnea

**n = 64**  
**p = 6.2%**

Age ≤ 30 yrs

**n = 12**  
**p = 50.0%**

Age > 30yrs

**n = 38**  
**p = 16.0%**

HIV negative/  
undeterminate

**n = 15**  
**p = 20.0%**

HIV positive

**n = 49**  
**p = 2.0%**

No Weight loss

**n = 7**  
**p = 0%**

Weight loss

**n = 8**  
**p = 38.0%**
